# Supplementary material for: Synthesis of diatrizoic acid-modified LAPONITE® nanodisks for CT imaging applications
Source: Royal Society of Chemistry journal article supplement (doi:10.1039/c6ra11755d), 2016-01-01
Supplement: c6ra11755d1.pdf [file c6ra11755d1.pdf]

## Electronic Supplementary Information

# Synthesis of diatrizoic acid-modified laponite nanodisks for CT imaging applications

Rania Mustafa <sup>a1</sup>, Yong Hu <sup>a1</sup>, Jia Yang <sup>b1</sup>, Jingwen Chen <sup>b</sup>, Han Wang <sup>b\*</sup>, Guixiang Zhang <sup>b\*</sup>,  
Xiangyang Shi <sup>a\*</sup>

---

<sup>a</sup> College of Chemistry, Chemical Engineering and Biotechnology, Donghua University, Shanghai 201620, P. R. China. Email: xshi@dhu.edu.cn

<sup>b</sup> Department of Radiology, Shanghai General Hospital, School of Medicine, Shanghai Jiaotong University, Shanghai 200080, P. R. China. Email: guixiangzhang@sina.com (G. Zhang), bingowh@hotmail.com (H. Wang)

<sup>c</sup> National Engineering Research Center for Nanotechnology, Shanghai 200241, P. R. China

<sup>1</sup> These authors equally contributed to this work.

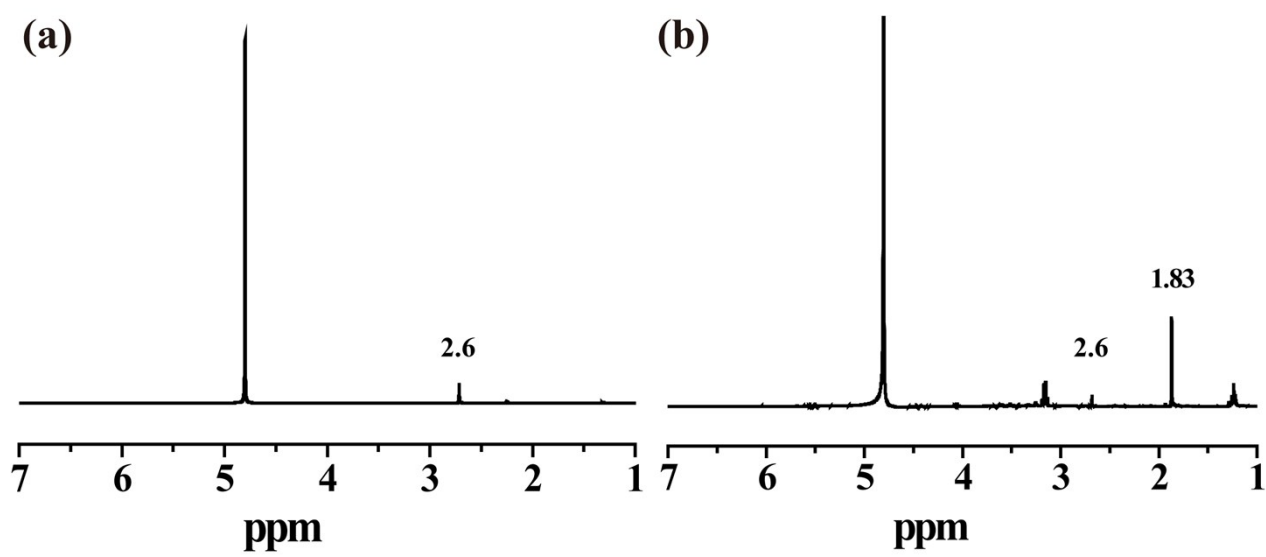

**Figure S1.** <sup>1</sup>H NMR spectra of (a) LM-NH<sub>2</sub>-DTA and (b) LM-NHAc-DTA NPs dispersed in D<sub>2</sub>O.
